# Supplementary material for: Size-transformable nanohybrids with pH/redox/enzymatic sensitivity for anticancer therapy
Source: Royal Society of Chemistry journal article supplement (doi:10.1039/d1tb00396h), 2021-01-01
Supplement: d1tb00396h1.pdf [file d1tb00396h1.pdf]

## Supporting information

### Size-transformable nanohybrids with pH/redox/enzymatic-sensitivity for anticancer therapy

Bozhen Wu<sup>a</sup>, Mingpei Li<sup>a</sup>, Liudi Wang<sup>b</sup>, Zoya Iqbal<sup>b</sup>, Kaiqi Zhu<sup>a</sup>, Yuhao Yang<sup>a</sup>, Yulin Li<sup>b\*</sup>

<sup>a</sup> College of Materials Science and Engineering, Zhejiang University of Technology, Hangzhou 310014, China.

<sup>b</sup> The State Key Laboratory of Bioreactor Engineering and Key Laboratory for Ultrafine Materials of Ministry of Education, Key Laboratory for Ultrafine Materials of Ministry of Education, Engineering Research Centre for Biomedical Materials of Ministry of Education, East China University of Science and Technology, Shanghai 200237, China.

\*E-mail: yulinli@ecust.edu.cn (Yulin Li)

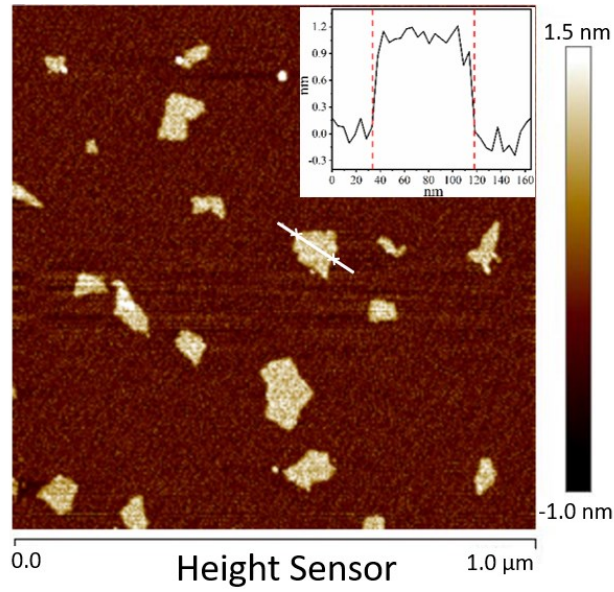

**Figure S1.** Atomic force microscope image of GO nanosheets.

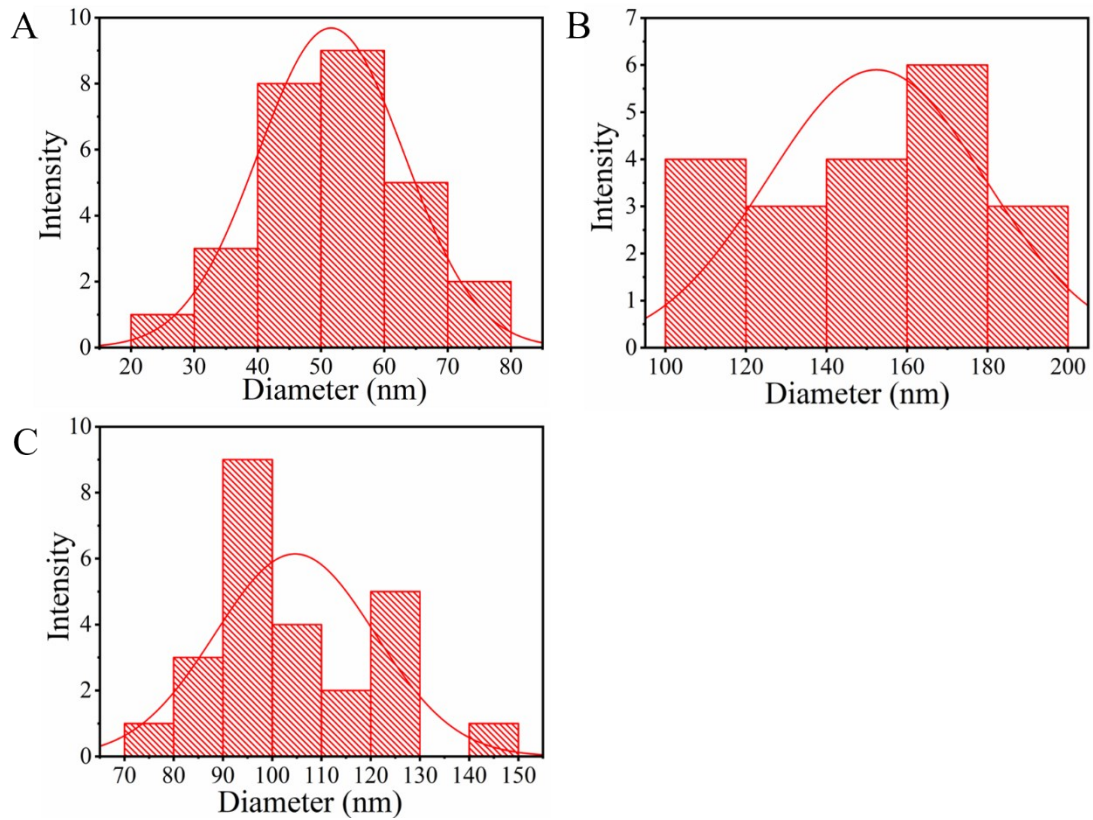

**Figure S2.** Result of particle size statistics on TEM image. (A) GO, (B) GGBD, and (C) GGBD pre-treated by MMP-2.
